# Supplementary material for: Tracing Sub-Structure in the European American Population with PCA-Informative Markers
Source: PLOS journal article supplement (doi:10.1371/journal.pgen.1000114), 2008-07-03
Supplement: S4 (10.1371/journal.pgen.1000114.s004) [file journal.pgen.1000114.s004]

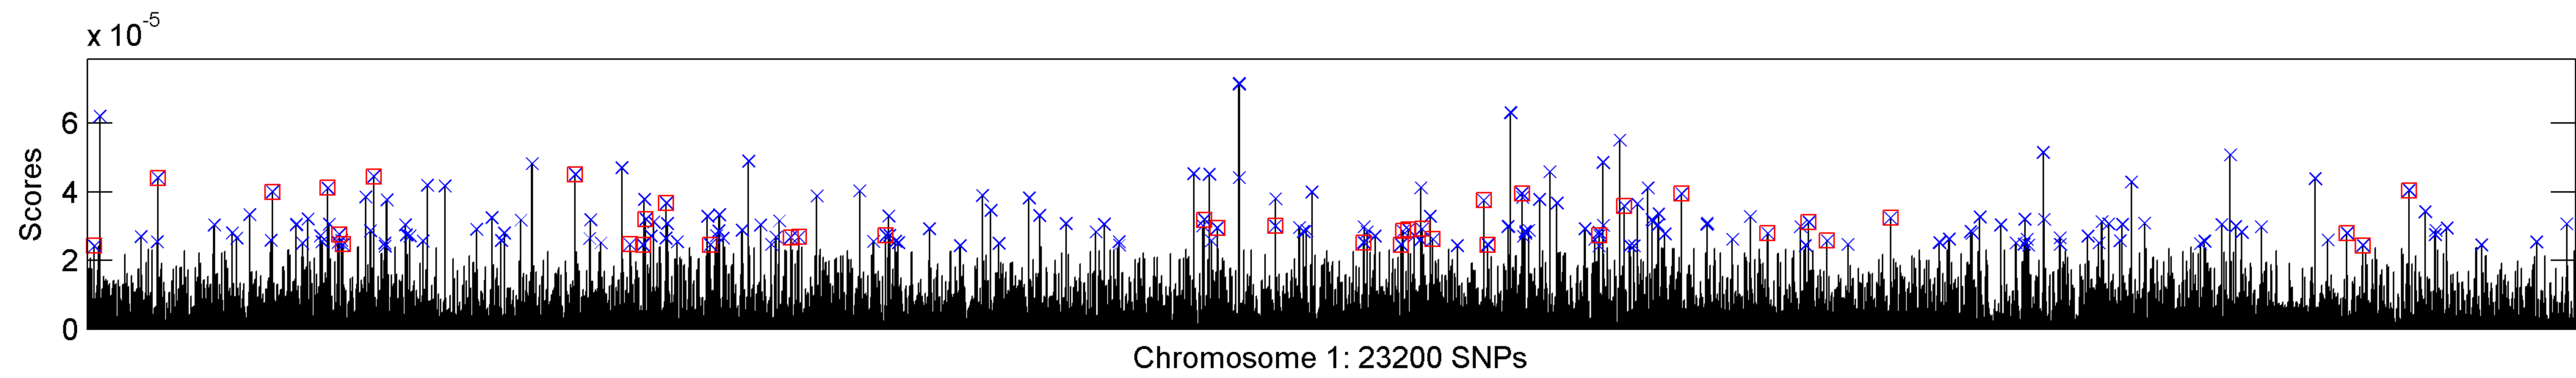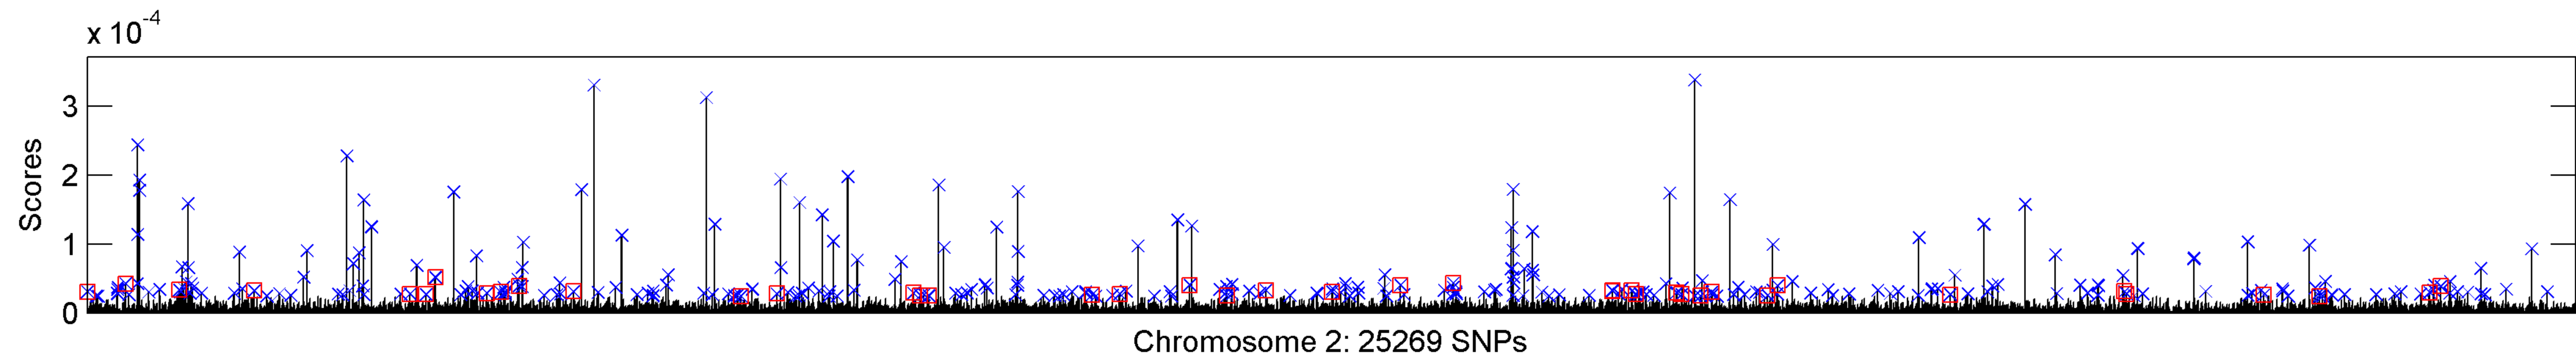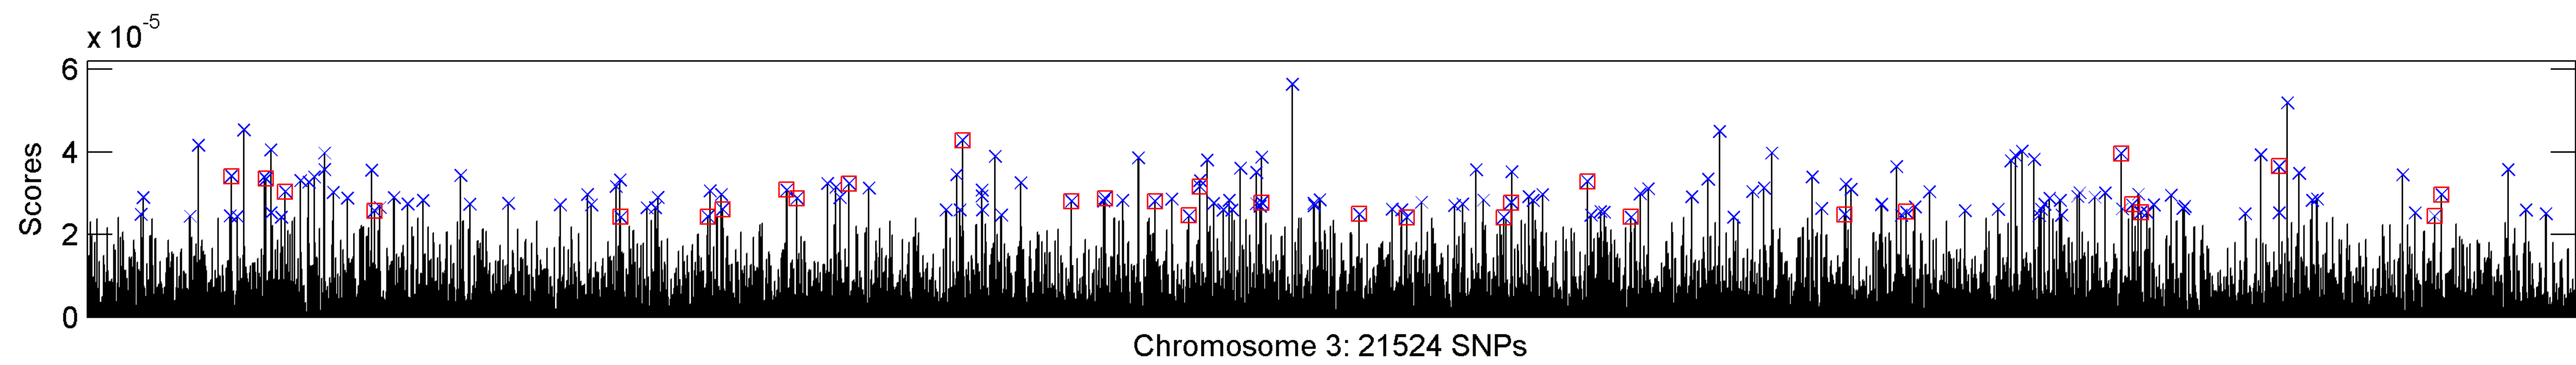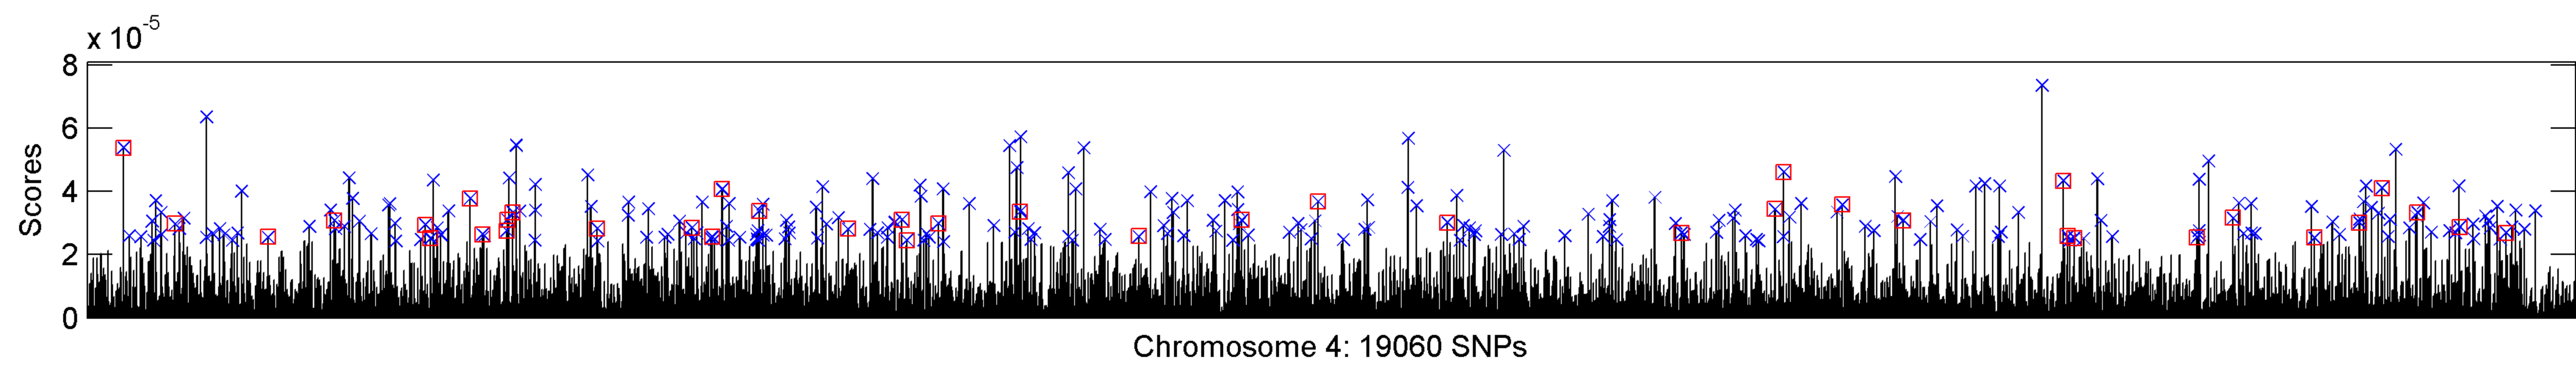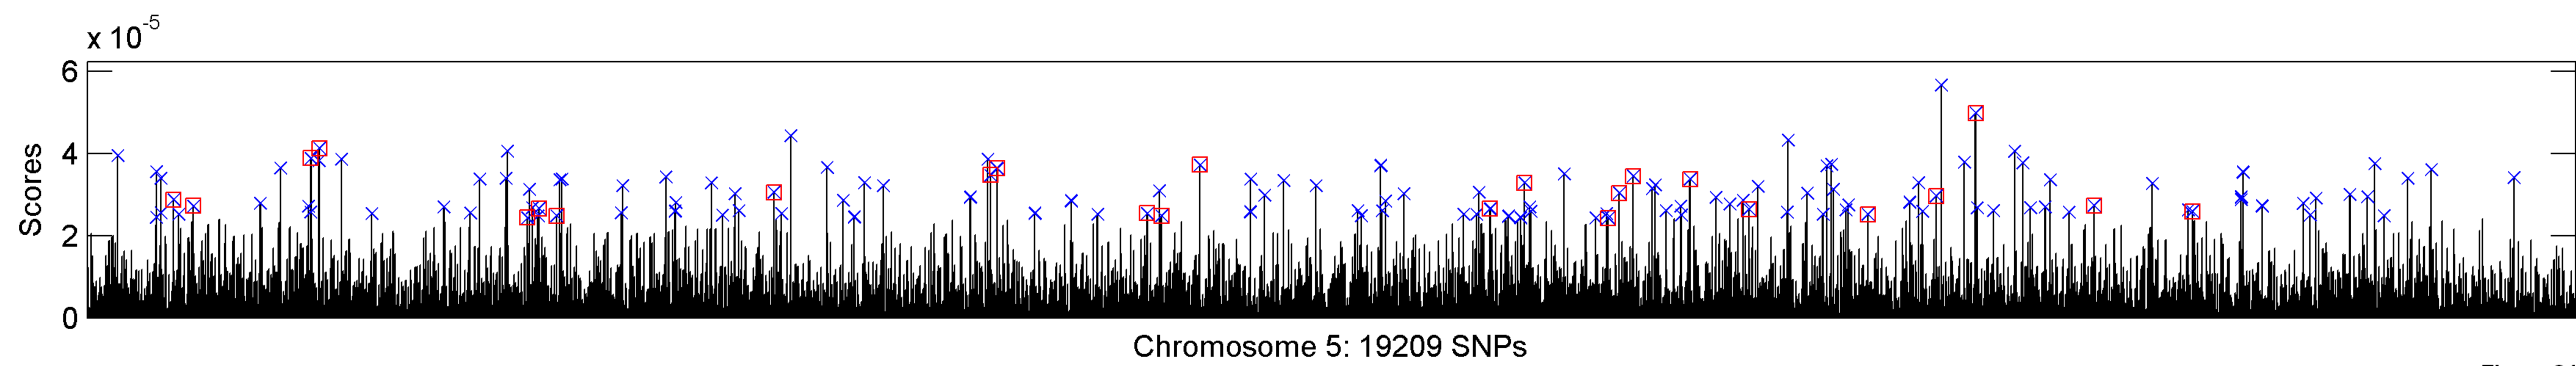

Figure S4A

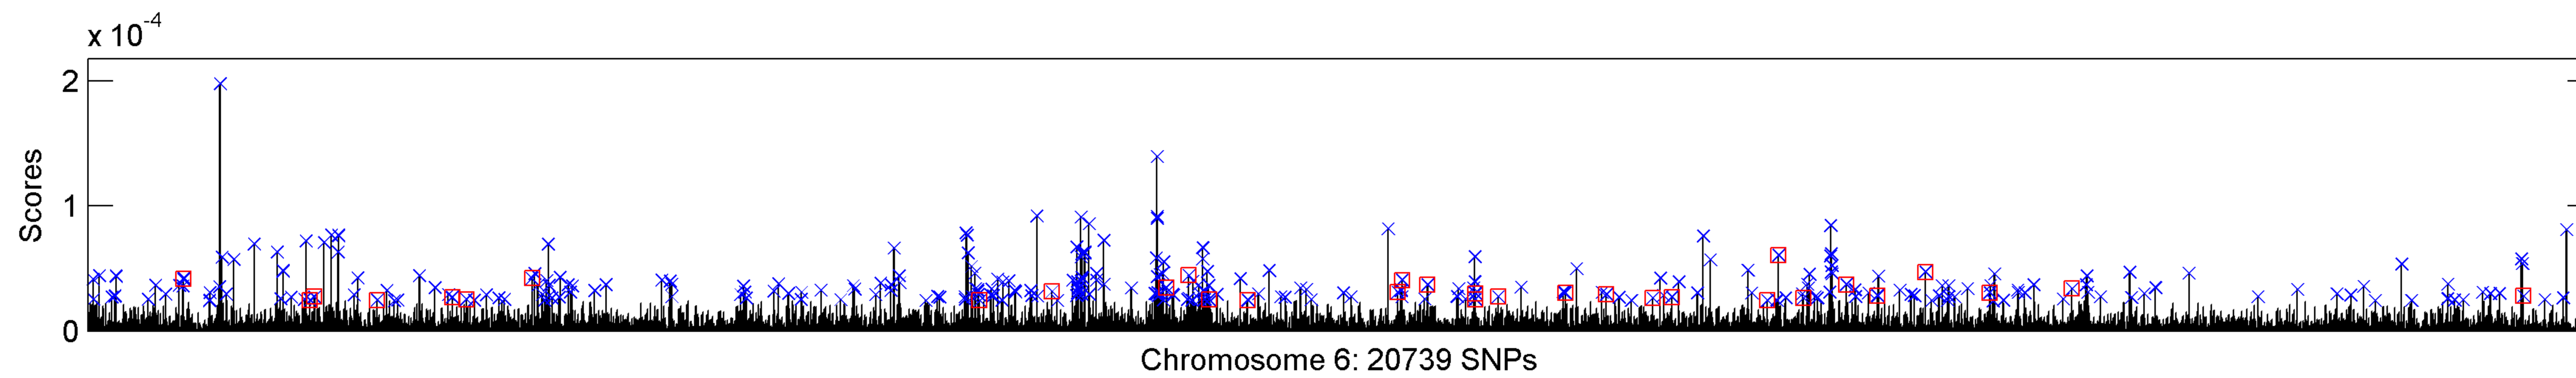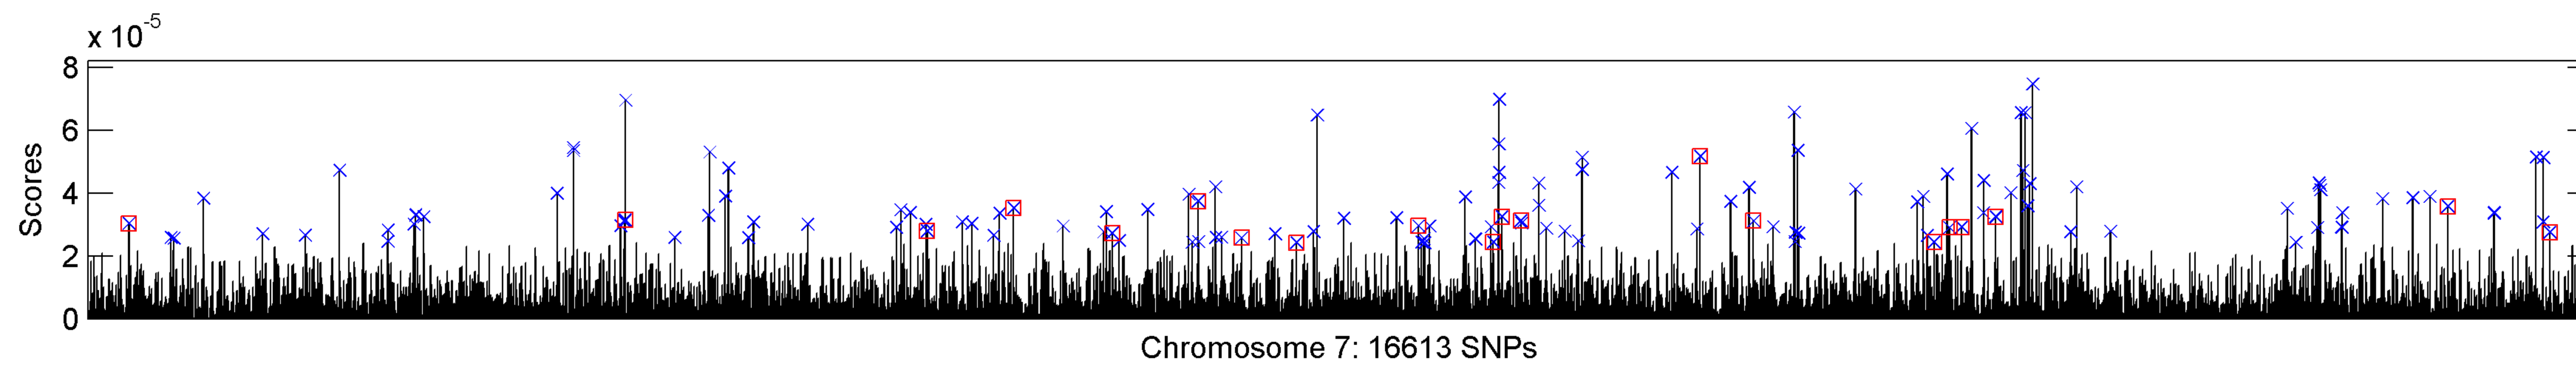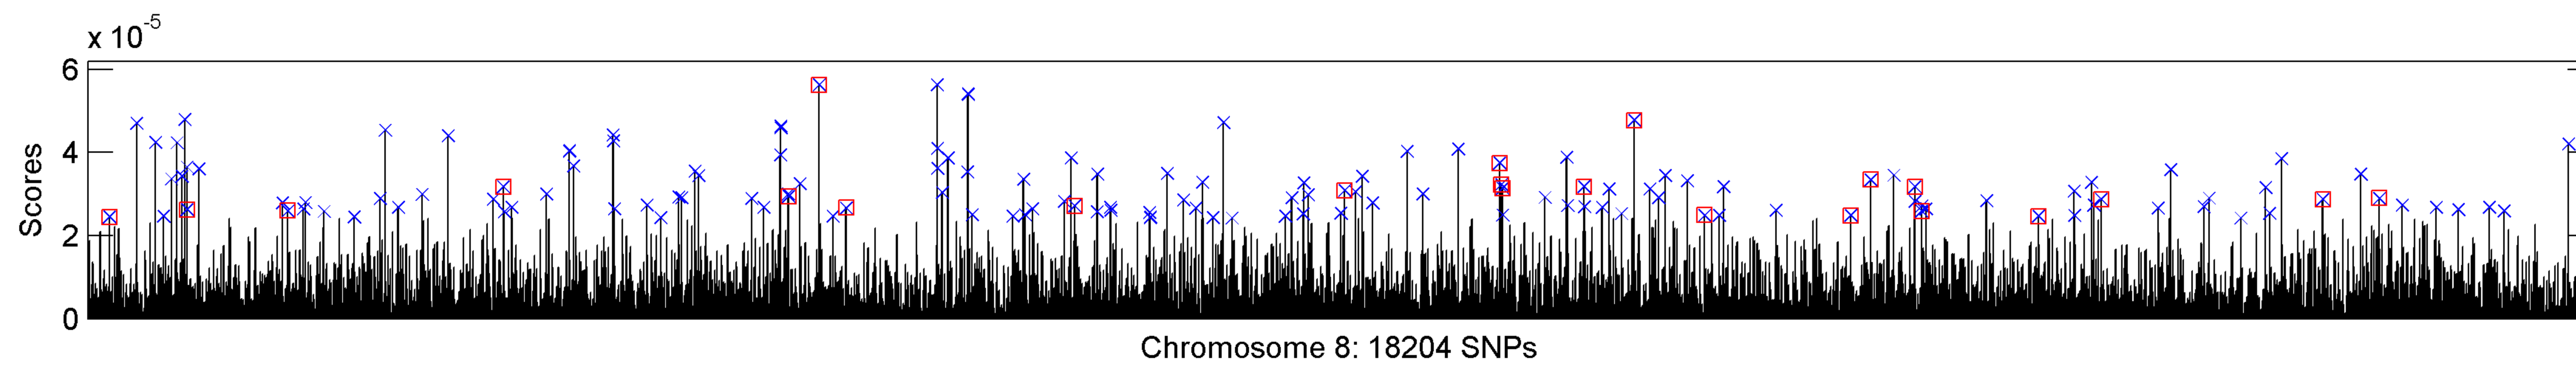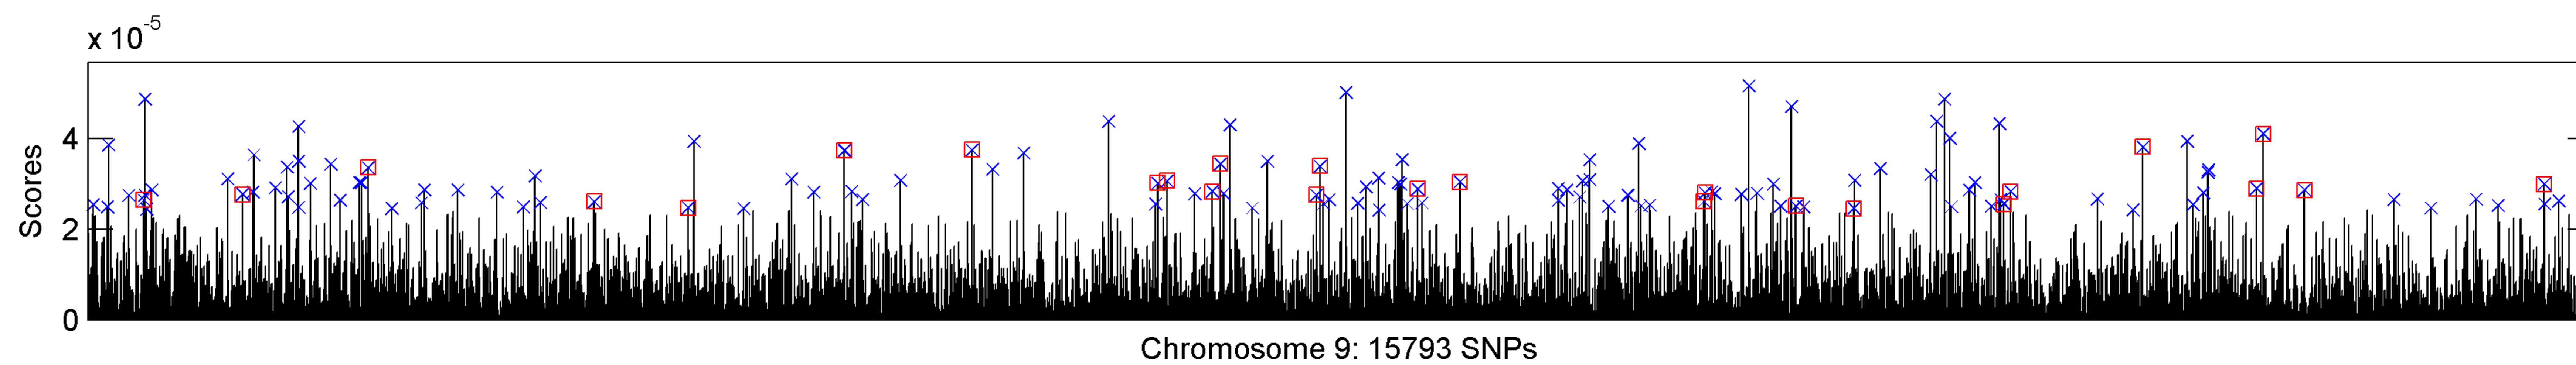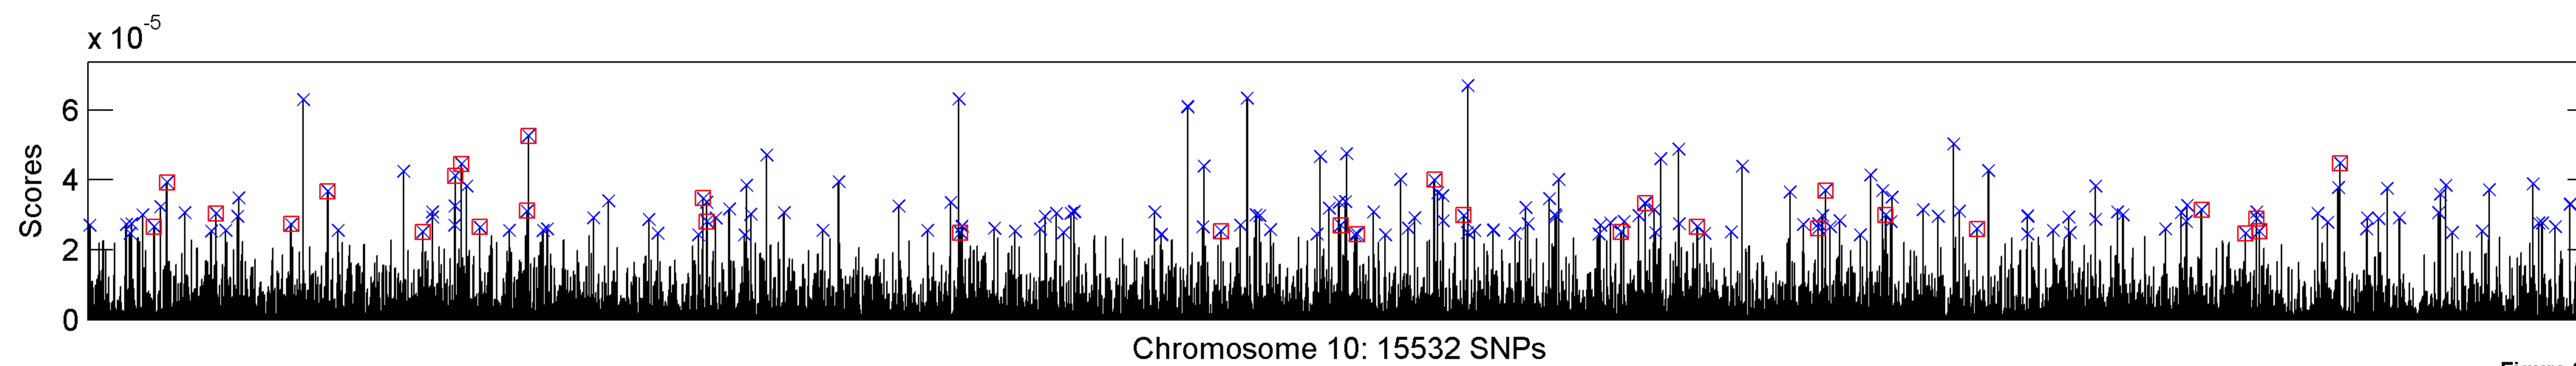

Figure S4B

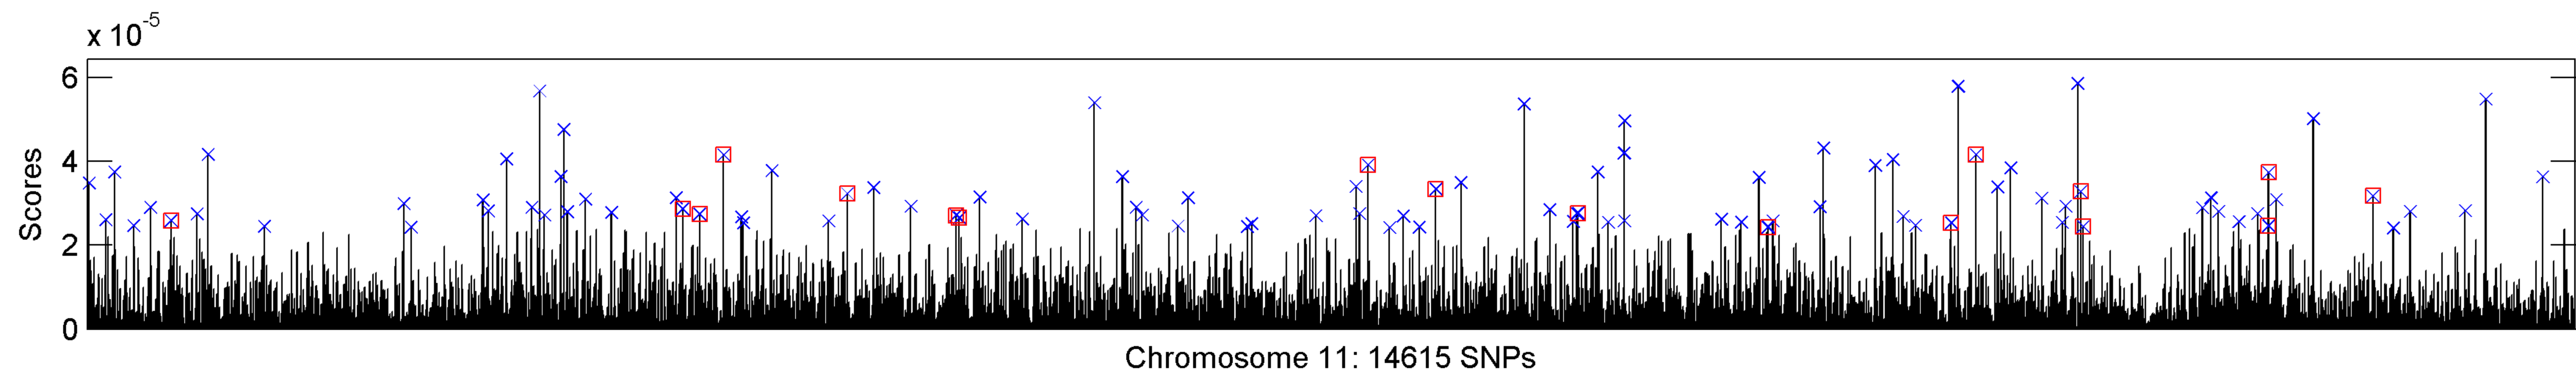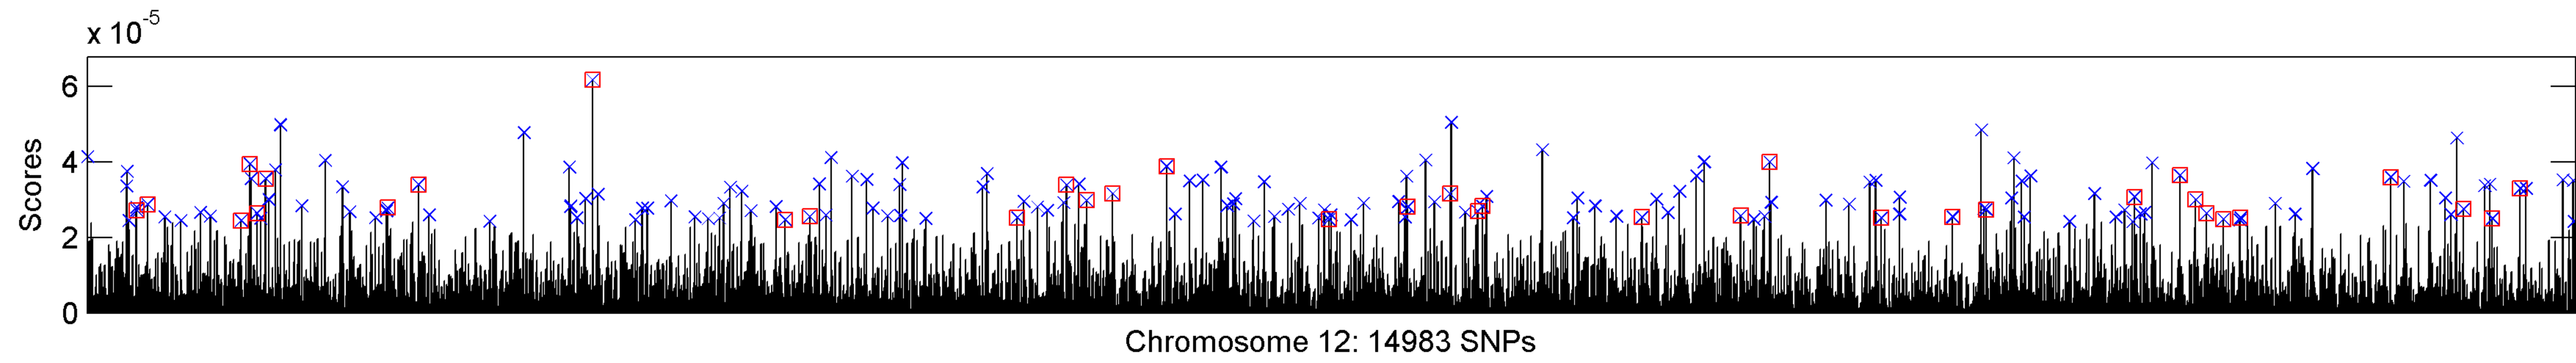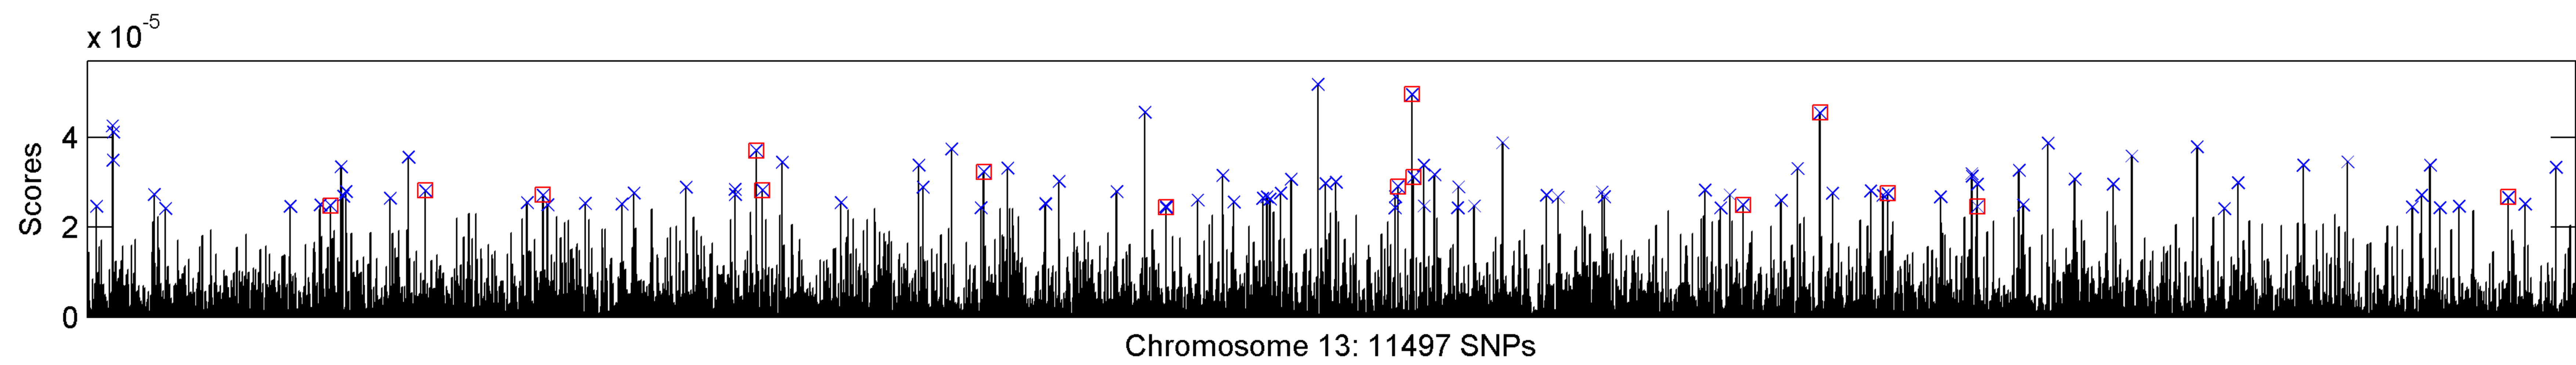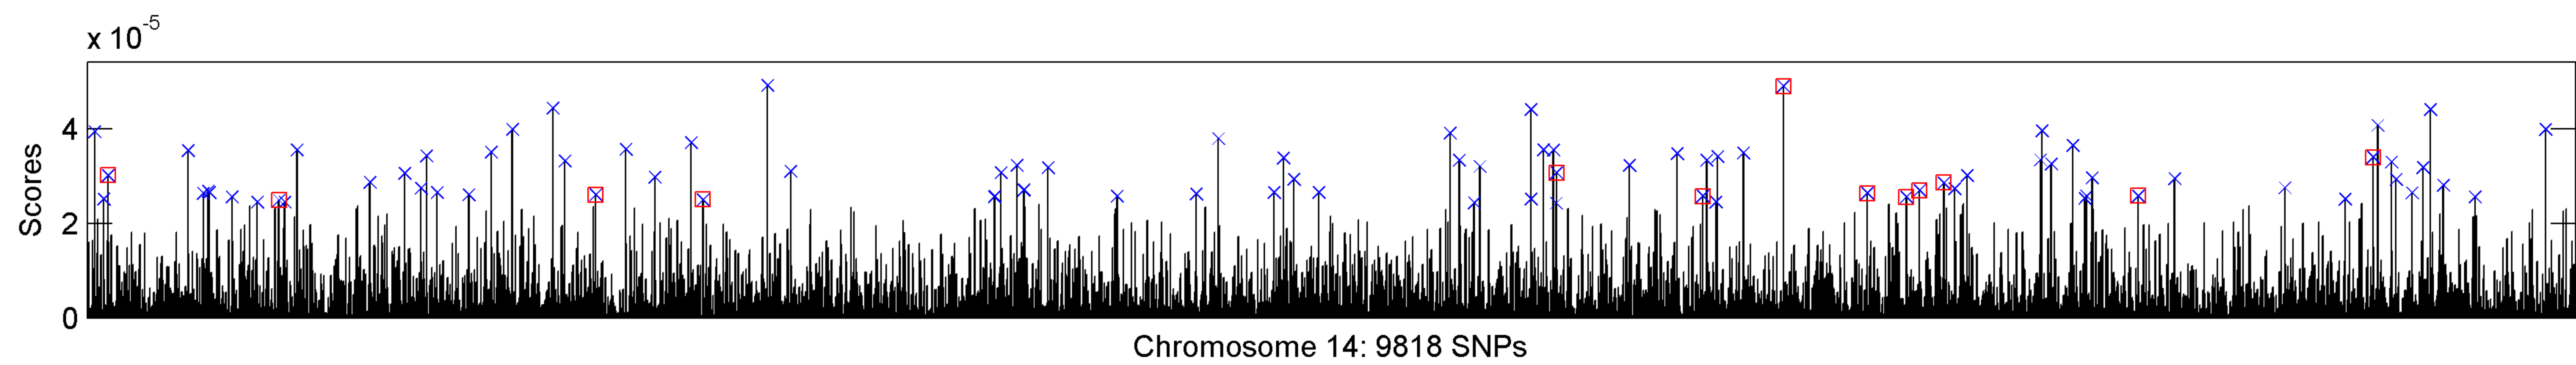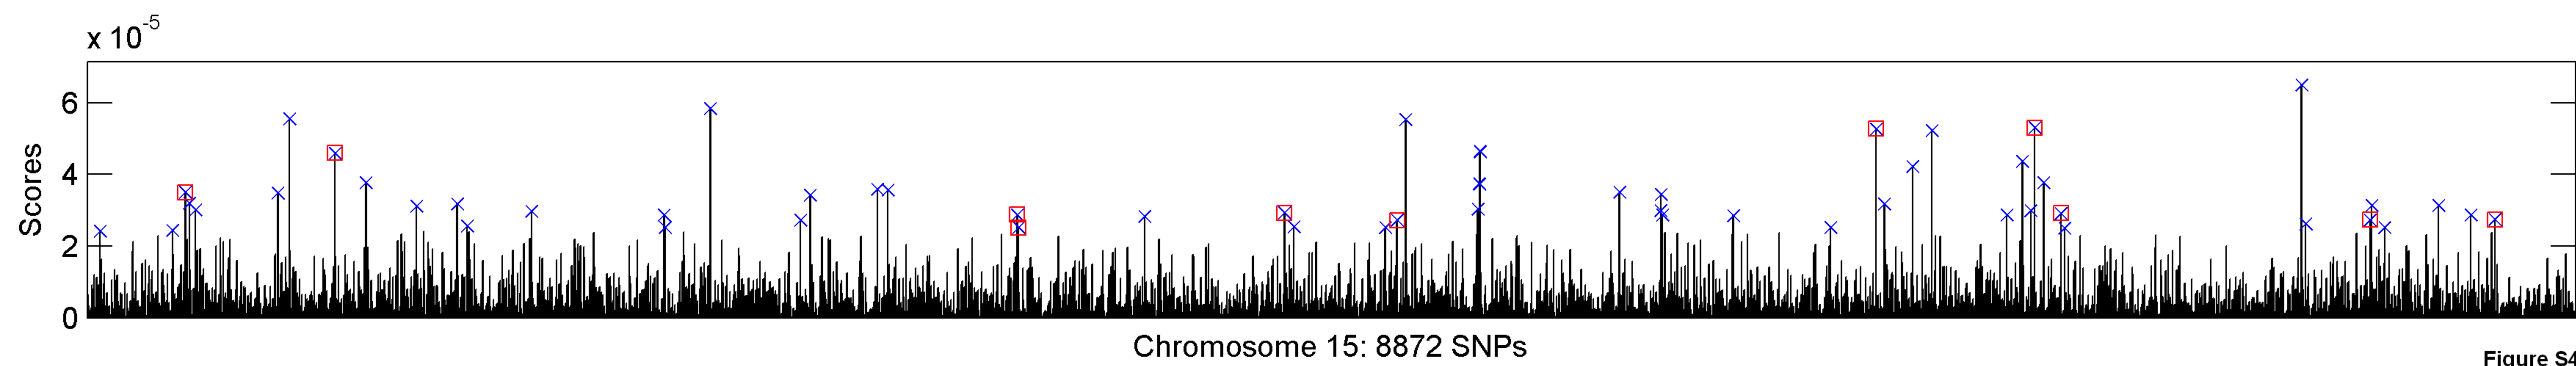

Figure S4C

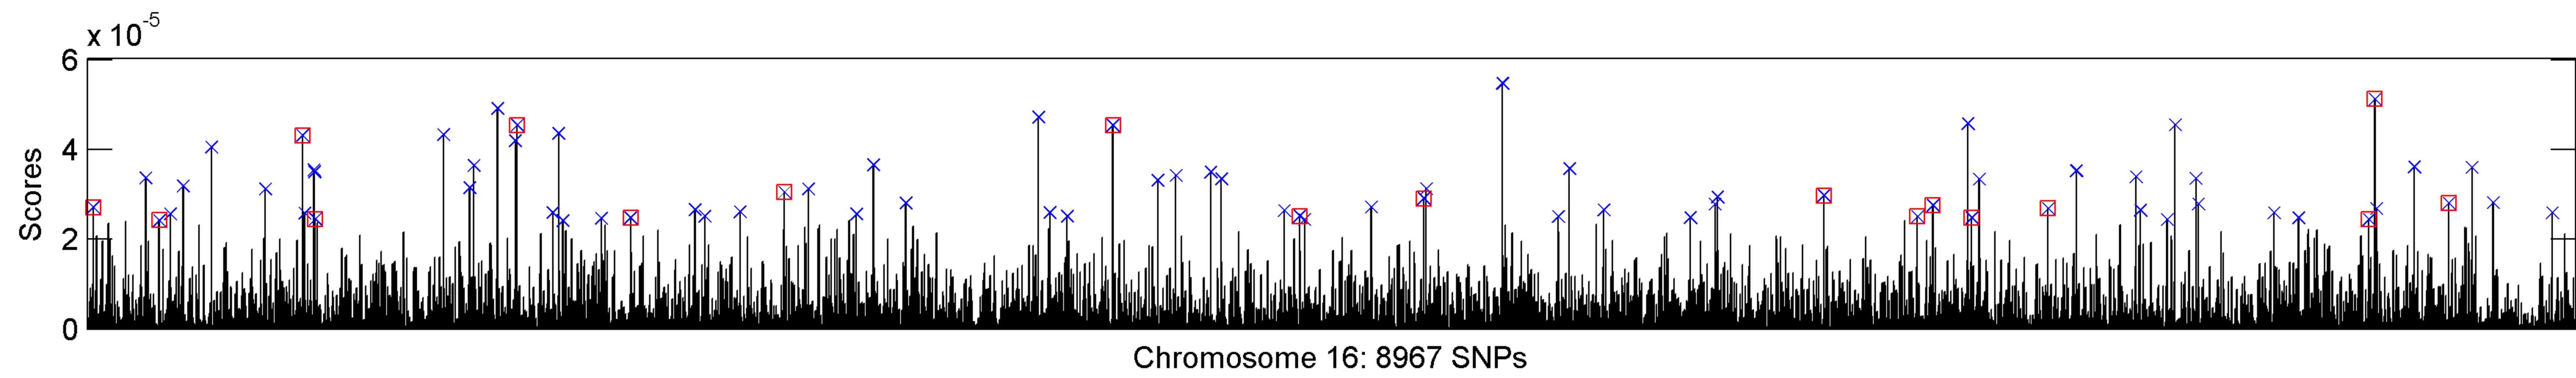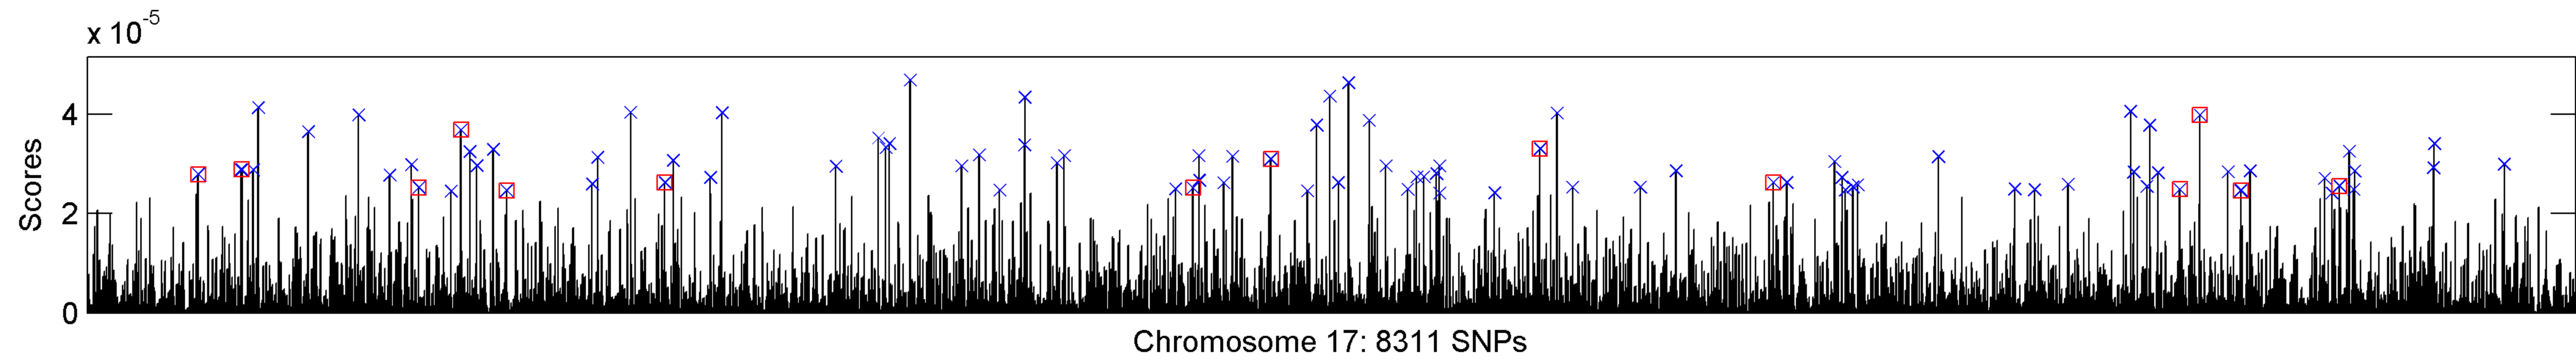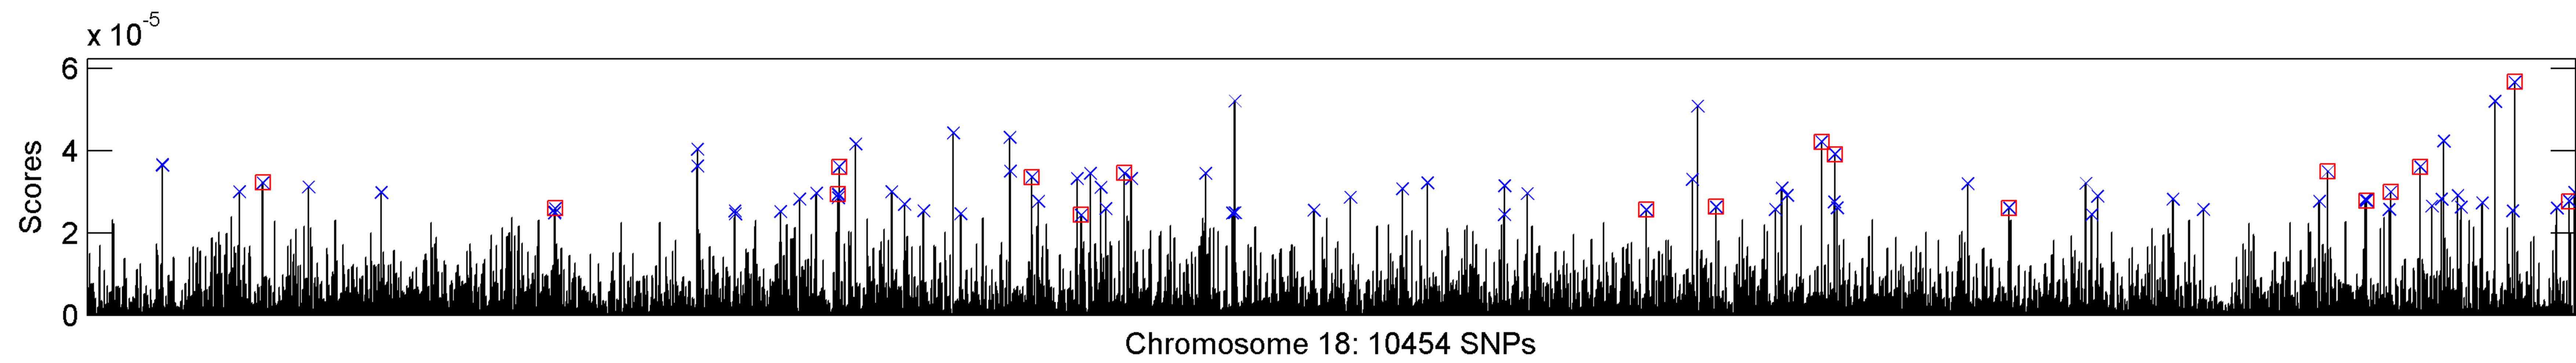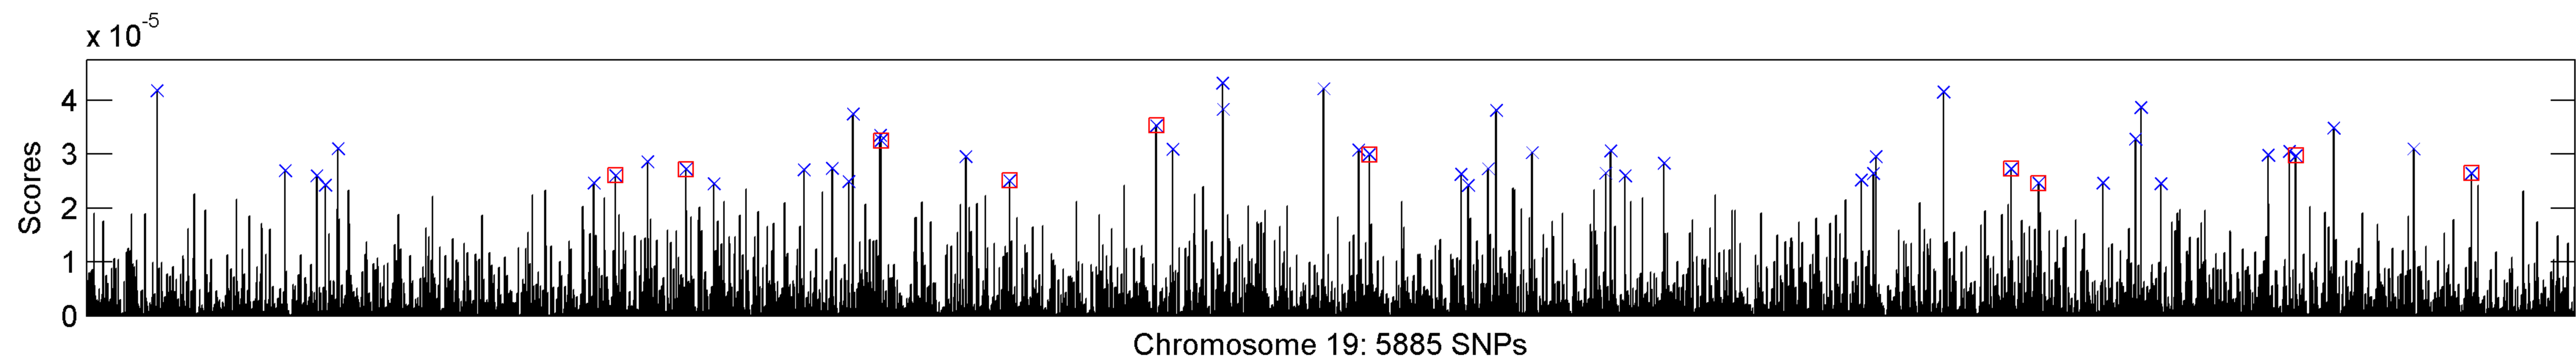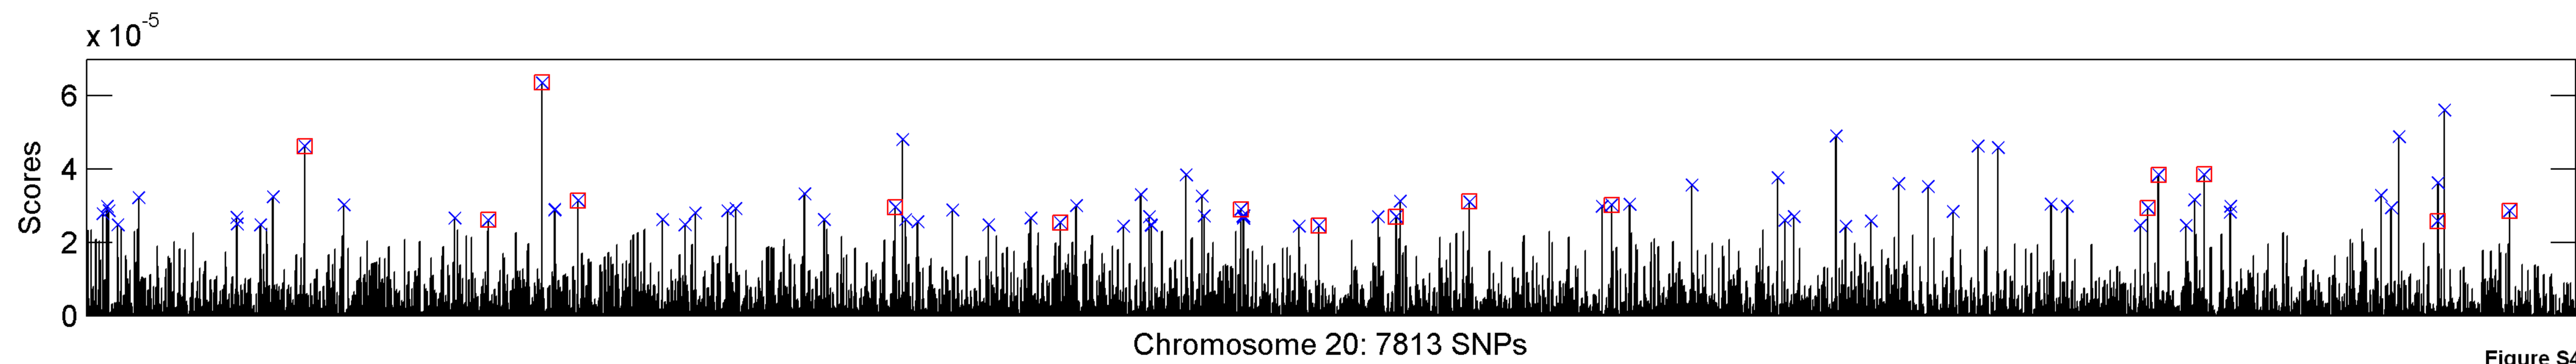

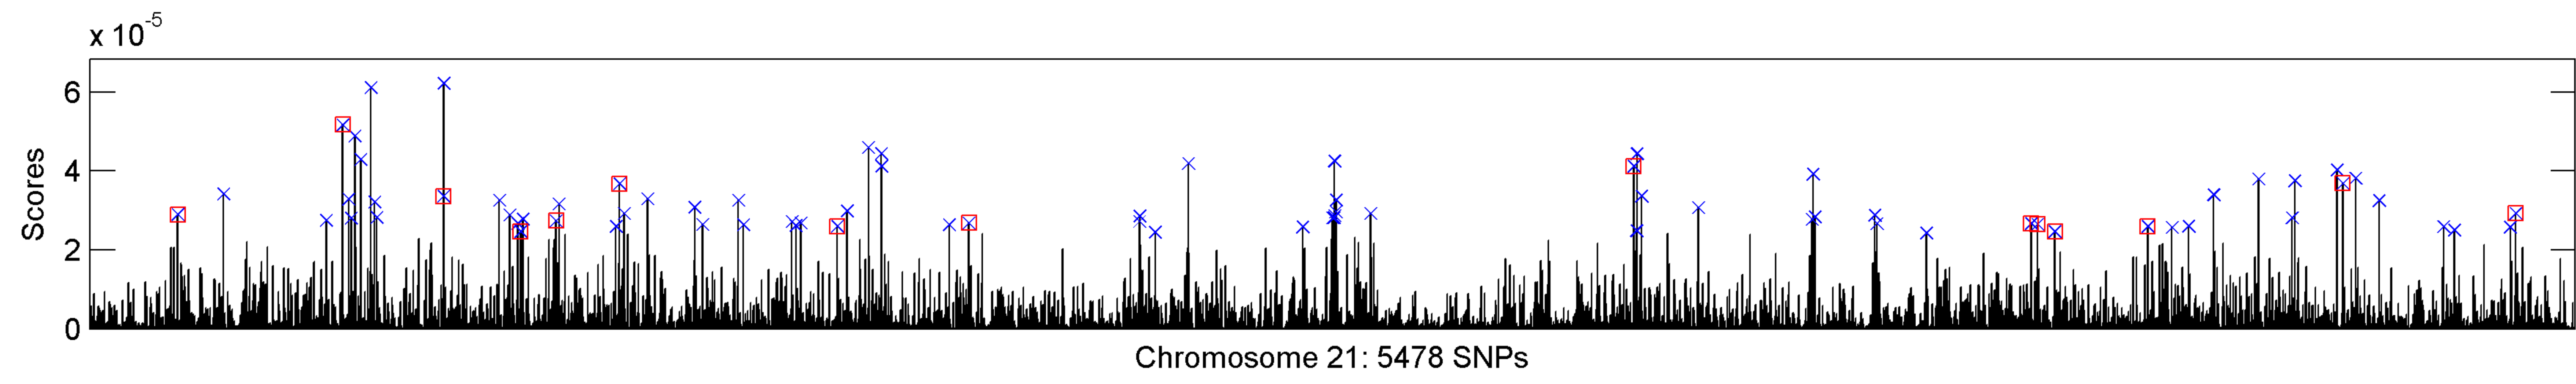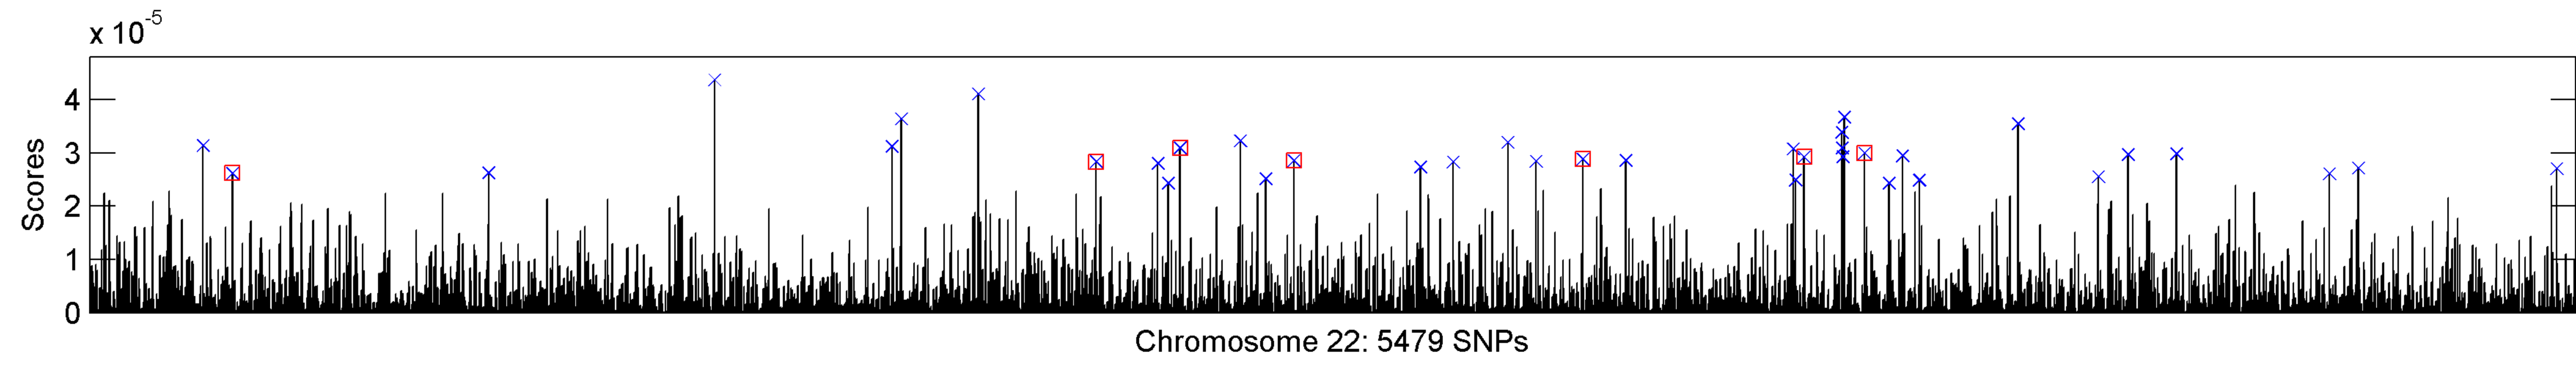

Figure S4E
